# Supplementary material for: Toward an interactive article: integrating journals and biological databases
Source: Springer Nature journal article supplement (doi:10.1186/1471-2105-12-175), 2011-05-19
Supplement: 12859_2010_4624_MOESM1_ESM.pdf [file 12859_2010_4624_MOESM1_ESM.pdf]

**Congratulations on your paper being accepted by GENETICS for publication!**

GENETICS is working with textpresso ([www.textpresso.org](http://www.textpresso.org)) and WormBase ([www.wormbase.org](http://www.wormbase.org)) to create links between genetic and genomic objects (genes, alleles, reagents, etc.) that are in the online full text and PDF formats of your paper to the appropriate page on WormBase. Existing WormBase objects that are in your paper will automatically be linked. *However, if you want any new objects discovered / described in your online paper to be linked to WormBase then you need to tell us what they are.*

Please use the form provided below to enter the names of these objects. This information will be sent to WormBase where these objects will be curated and made available in the next possible release of our database. Follow the examples carefully as your data will be processed automatically. If you would rather upload a file, please contact [kyook@caltech.edu](mailto:kyook@caltech.edu).

Thank you for your help.

Best Wishes,  
WormBase

<http://www.wormbase.org>

[wormbase-help@wormbase.org](mailto:wormbase-help@wormbase.org)

Click the "?" to find out more about the data type.

Click the "Add information" to open or close the data entry box.

## Enter new objects that you want linked in your paper :

- Genes cloned or mapped in this paper** (example: *cdf-2*, *mett-10*). ? [Add information](#).
- Alleles** (example: *dh115*, *oz36*, *u53*). ? [Add information](#).
- Strains (only those being sent to the CGC)** (example: YY166, YY173, YY216). ? [Add information](#).
- Rearrangements** (example: *hT96*, *cDf57*). ? [Add information](#).
- Transgenes** (example: *aml54*, *aml55*). ? [Add information](#).
- Cell / anatomy terms and synonyms** (example: arcade ring, sex myoblasts). ? [Add information](#).
