# Supplementary material for: Toward an interactive article: integrating journals and biological databases
Source: Springer Nature journal article supplement (doi:10.1186/1471-2105-12-175), 2011-05-19
Supplement: 12859_2010_4624_MOESM2_ESM.pdf [file 12859_2010_4624_MOESM2_ESM.pdf]

Originally published as *Genetics* Published Articles Ahead of Print on January 11, 2010.  
*Genetics*, Vol. 184, 899-913, April 2010, Copyright © 2010  
 doi:10.1534/genetics.109.111591v1

## EOR-2 Is an Obligate Binding Partner of the BTB-Zinc Finger Protein EOR-1 in *Caenorhabditis elegans*

Kelly Howell<sup>\*</sup>, Swathi Arur<sup>†</sup>, Tim Schedl<sup>†</sup> and **Meera V. Sundaram**

<sup>\*</sup> Department of Genetics, University of Pennsylvania School of Medicine, Philadelphia, Pennsylvania 19104 and <sup>†</sup> Department of Genetics, Washington University School of Medicine, St. Louis, Missouri 63110

<sup>\*</sup> Corresponding author: Department of Genetics, University of Pennsylvania School of Medicine, 415 Curie Blvd., 445 Clinical Research Bldg., Philadelphia, PA 19104.  
 E-mail: sundaram@mail.med.upenn.edu

Manuscript received November 2, 2009. Accepted for publication January 3, 2010.

**THIS ARTICLE**

Abstract  
 Full Text (PDF)  
 All versions of this Article:  
 genetics.109.111591v1  
 184/4/899 most recent

Alert me when this article is cited  
 Alert me if a correction is posted

**SERVICES**

Email this article to a friend  
 Similar articles in this journal  
 Similar articles in PubMed  
 Alert me to new issues of the journal  
 Download to citation manager  
 Reprints & Permissions

**PUBMED**

PubMed Citation

### ABSTRACT

BTB-zinc finger transcription factors play many important roles in metazoan development. In these proteins, the BTB domain is critical for dimerization and for recruiting cofactors to target genes. Identification of these cofactors is important for understanding how BTB-zinc finger proteins influence transcription. Here we show that the novel but conserved protein **EOR-2** is an obligate binding partner of the BTB-zinc finger protein **EOR-1** in *Caenorhabditis elegans*. **EOR-1** and **EOR-2** function together to promote multiple Ras/ERK-dependent cell fates during *D. elegans* development, and we show that **EOR-1** is a robust substrate of ERK *in vitro*. A point mutation (L81F) in the **EOR-1** BTB domain reduces both ERK phosphorylation and **EOR-2** binding and eliminates all detectable biological function without affecting **EOR-1** expression levels, localization, or dimerization. This point mutation lies near the predicted charged pocket region of the **EOR-1** BTB dimer, a region that, in other BTB-zinc finger proteins, has been proposed to interact with corepressors or coactivators. We also show that a conserved zinc finger-like motif in **EOR-2** is required for binding to **EOR-1**, that the interaction between **EOR-1** and **EOR-2** is direct, and that **EOR-2** can bind to the human BTB-zinc finger protein PLZF. We propose that **EOR-2** defines a new family of cofactors for BTB-zinc finger transcription factors that may have conserved roles in other organisms.

THE BTB (or POZ) domain, named for founding members *bric-à-brac*, *tramtrack*, and *broad* complex, is a protein-protein interaction domain evolutionarily conserved from yeast to humans (reviewed in PEREZ-TORRADO *et al.* 2006). While some proteins such as Skp1 and Elongin C are made up almost entirely of the BTB domain, most BTB proteins consist of the BTB domain in the N terminus and other functional domains in the C terminus by which they are classified. These different classes of BTB domains all share a well-conserved tertiary structure termed the "core BTB fold"

- TOP
- >ABSTRACT
- MATERIALS AND METHODS
- RESULTS
- DISCUSSION
- ACKNOWLEDGEMENTS
- LITERATURE CITED

Home Genome Synteny Blast / Blast WormMart Markers Genetic Maps Submit Searches Site Map

Find: WBPers637 Anything

**WormBase** The Biology and Genome of *C. elegans*

Person Info Bibliography Tree Display XML Schema AceDb Image

## Person Report: Meera Sundaram

Enter name (Last or Last F): WBPers637  
 Add or update your information in our lineage of *C. elegans* scientists.  
 Add or update your contact information.

**Meera Sundaram**

|                             |                                                                                                                                                                                                                                                                                     |
|-----------------------------|-------------------------------------------------------------------------------------------------------------------------------------------------------------------------------------------------------------------------------------------------------------------------------------|
| <b>Name</b>                 | <b>First name:</b> Meera<br><b>Middle name:</b> Vedavalli<br><b>Last name:</b> Sundaram<br><b>Standard name:</b> Meera Sundaram<br><b>Full name:</b> Meera Vedavalli Sundaram<br><b>Also known as:</b> Meera Sundaram, Meera V. Sundaram, MV Sundaram, M Sundaram, Meera V Sundaram |
| <b>Address</b>              | <b>Street address:</b> Department of Genetics<br>University of Pennsylvania                                                                                                                                                                                                         |
| <b>WormBase Identifier:</b> | WBPers637                                                                                                                                                                                                                                                                           |

Home Genome Synteny Blast / Blast WormMart Markers Genetic Maps Submit Searches Site Map

Find: WBGene0001325 Anything

**WormBase** The Biology and Genome of *C. elegans*

Gene Summary Locus Summary Sequence Summary Protein Summary EST Alignments Genome Browser Genetic Map Nearby Genes Bibliography Tree Display XML Schema Image

## Gene Summary for eor-2

Specify a gene using a gene name (unc-26), a predicted gene id (R13A5.9), or a protein ID (CE02711)  eor-2  
 [identification][location][function][expression][gene ontology][genetics][homology][regents][bibliography]

| Identification | IDs: | Main name                                                                                                 | Sequence name | WB Gene ID    |
|----------------|------|-----------------------------------------------------------------------------------------------------------|---------------|---------------|
|                |      | eor-2 ( <i>Egl-1 suppressor/DIO uptake defective/rat enhance</i> )<br>via Person evidence: Meera Sundaram | C44H4.7       | WBGene0001325 |

**Concise Description:** eor-2 encodes an unfamiliar protein, similar to CG17233 in *Drosophila* and KIAA1205 in *H. sapiens*, required for signal transduction by both RAS and Wnt pathways in both excretory system development and P12 fate specification. [details]

**NCBI KOGs\*:** Uncharacterized conserved protein [KOG4805]

**Species:** *Caenorhabditis elegans*

- Other sequences

| Gene model(s) | Gene Model | Status                          | Nucleotides (coding/transcript) | Protein    | Amino Acids |
|---------------|------------|---------------------------------|---------------------------------|------------|-------------|
|               | C44H4.7a   | 1, 2 confirmed by cDNA(s)       | 2919/5561 bp                    | WP:CE31445 | 972 aa      |
|               | C44H4.7b   | 1, 2, 3, 4 confirmed by cDNA(s) | 2874/5594 bp                    | WP:CE31446 | 957 aa      |

- Footnotes
- Other Notes
- Revision History

**Location**

**Genetic Position:** X:18.51 +/- 0.476 cM [mapping data]

**Genomic Position:** X:14602989..14608582 bp [View Genome Browser]

**Genomic Environments:**
